# Supplementary material for: Designing a ferrocene biphenyl pyridine modified electrode for the non-enzymatic electrochemical detection of catechol
Source: Royal Society of Chemistry journal article supplement (doi:10.1039/d4nj00710g), 2024-01-01
Supplement: d4nj00710g1.pdf [file d4nj00710g1.pdf]

## Designing ferrocene biphenyl pyridine modified electrode towards the non-enzymatic electrochemical detection of catechol

Palani Purushothaman, Devarasu Mohanapriya, Kathavarayan Thenmozhi

Subramanian Karpagam \*

\*Corresponding author: Department of Chemistry, School of Advanced Sciences, Vellore Institute of Technology, Vellore -14, Tamil Nadu, India. Telephone: 91-416-2202334, Fax: 91-416-2243092 \*Email: [skarpagam80@yahoo.com](mailto:skarpagam80@yahoo.com)

| Figure/Table | Content                                                                                                                                                   | Page no. |
|--------------|-----------------------------------------------------------------------------------------------------------------------------------------------------------|----------|
| S1           | <sup>1</sup> H NMR spectrum of <b>Fc-BPy</b> .....                                                                                                        | 2        |
| S2           | <sup>13</sup> C NMR spectrum of <b>Fc-BPy</b> .....                                                                                                       | 2        |
| S3           | HRMS data of <b>Fc-BPy</b> .....                                                                                                                          | 3        |
| S4           | FT-IR Spectrum of <b>Fc-BPy</b> .....                                                                                                                     | 3        |
| S5           | UV-Vis spectroscopic response of <b>Fc-BPy</b> .....                                                                                                      | 4        |
| S6           | Single crystal X-ray structure of <b>Fc-BPy</b> with atomic labelling (thermal ellipsoid at 50% probability level).....                                   | 4        |
| S7           | Columnar diagram for the current response of five similarly prepared <b>Fc-BPy/GCE</b> in absence and presence of <b>CC</b> . Electrolyte: 0.1 M PBS..... | 5        |
| Table 1      | Crystal data and structural refinement of <b>Fc-BPy</b> .....                                                                                             | 6        |

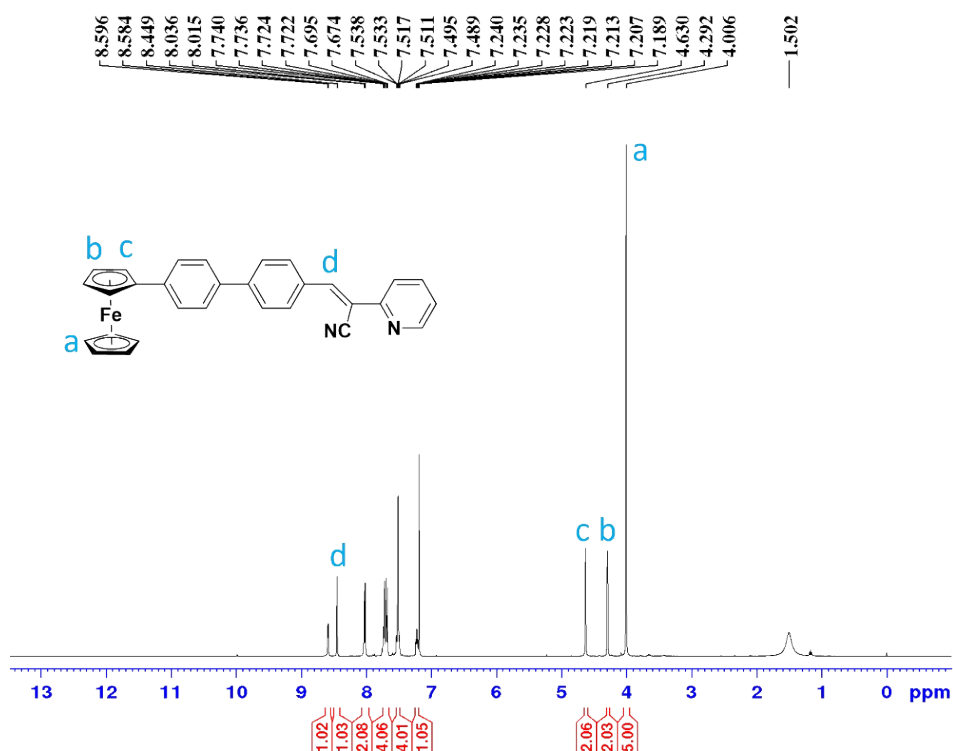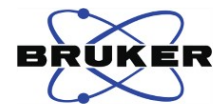

Current Data Parameters  
 NAME Dr.SKP050123  
 EXPNO 4  
 PROCNO 1

F2 - Acquisition Parameters  
 Date 20230105  
 Time 11.19 h  
 INSTRUM spect  
 PROBHID Z108618\_0505 ( )  
 PULPROG zg30  
 TD 65536  
 SOLVENT CDCl3  
 NS 32  
 DS 2  
 SWH 8012.820 Hz  
 FIDRES 0.244532 Hz  
 AQ 4.0894465 sec  
 RG 199.6  
 DW 62.400 usec  
 DE 6.50 usec  
 TE 305.2 K  
 D1 1.00000000 sec  
 TD0 1  
 SFO1 400.2604716 MHz  
 NUC1 1H  
 P1 15.00 usec  
 PLW1 14.95499992 W

F2 - Processing parameters  
 SI 65536  
 SF 400.2580382 MHz  
 WDW EM  
 SSB 0  
 LB 0.30 Hz  
 GB 0  
 PC 1.00

Fig S1. <sup>1</sup>H NMR spectrum of Fc-BPy

Signature SIF VIT VELLORE  
 Fc-BPy

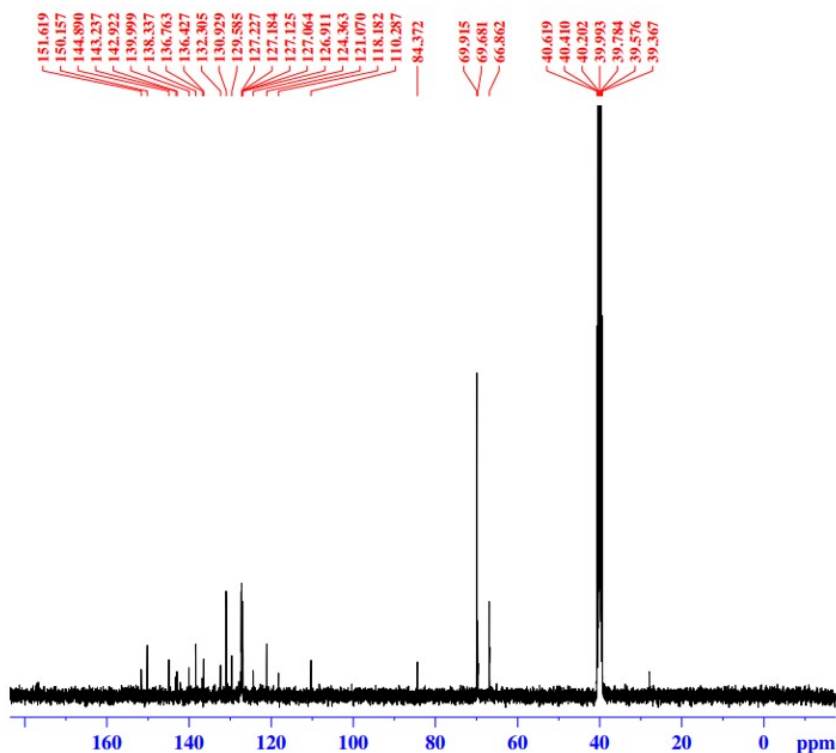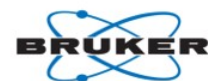

Current Data Parameters  
 NAME Dr.SKP040723  
 EXPNO 3  
 PROCNO 1

F2 - Acquisition Parameters  
 Date\_ 20230705  
 Time 3.17 h  
 INSTRUM spect  
 PROBHID Z108618\_0505 ( )  
 PULPROG zgpg30  
 TD 65536  
 SOLVENT DMSO  
 NS 512  
 DS 4  
 SWH 24038.461 Hz  
 FIDRES 0.733596 Hz  
 AQ 1.3631488 sec  
 RG 199.6  
 DW 20.800 usec  
 DE 6.50 usec  
 TE 303.6 K  
 D1 2.00000000 sec  
 D11 0.03000000 sec  
 TD0 1  
 SFO1 100.6550186 MHz  
 NUC1 13C  
 P1 10.00 usec  
 PLW1 58.22499847 W  
 SFO2 400.2596010 MHz  
 NUC2 1H  
 CPDPRG[2] waltz16  
 PCPD2 90.00 usec  
 PLW2 14.95499992 W  
 PLW12 0.41542000 W  
 PLW13 0.20895000 W

F2 - Processing parameters  
 SI 32768  
 SF 100.6449542 MHz  
 WDW EM  
 SSB 0  
 LB 1.00 Hz  
 GB 0  
 PC 1.40

Fig S2. <sup>13</sup>C NMR spectrum of Fc-BPy

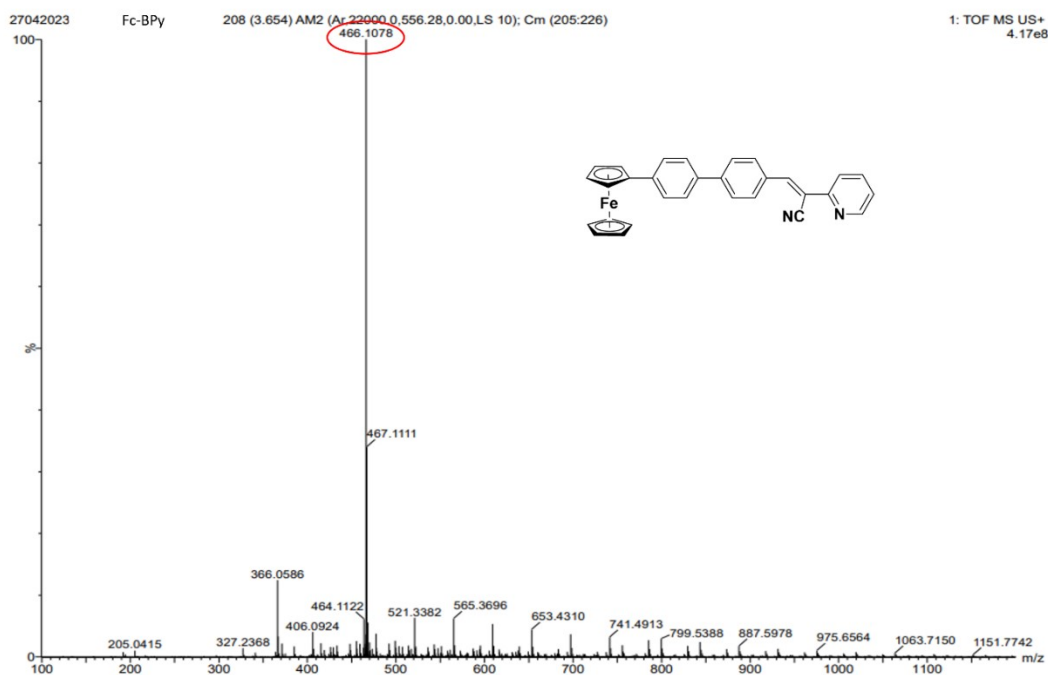

Fig S3. HRMS data of **Fc-BPy**

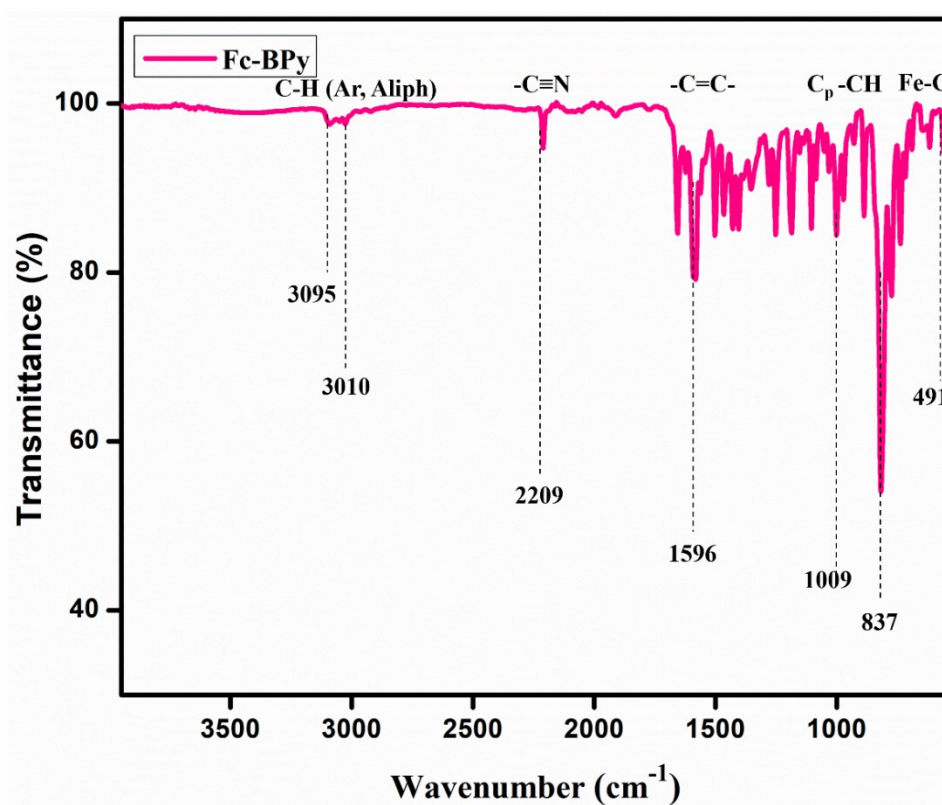

Fig S4. FT-IR Spectrum of **Fc-BPy**

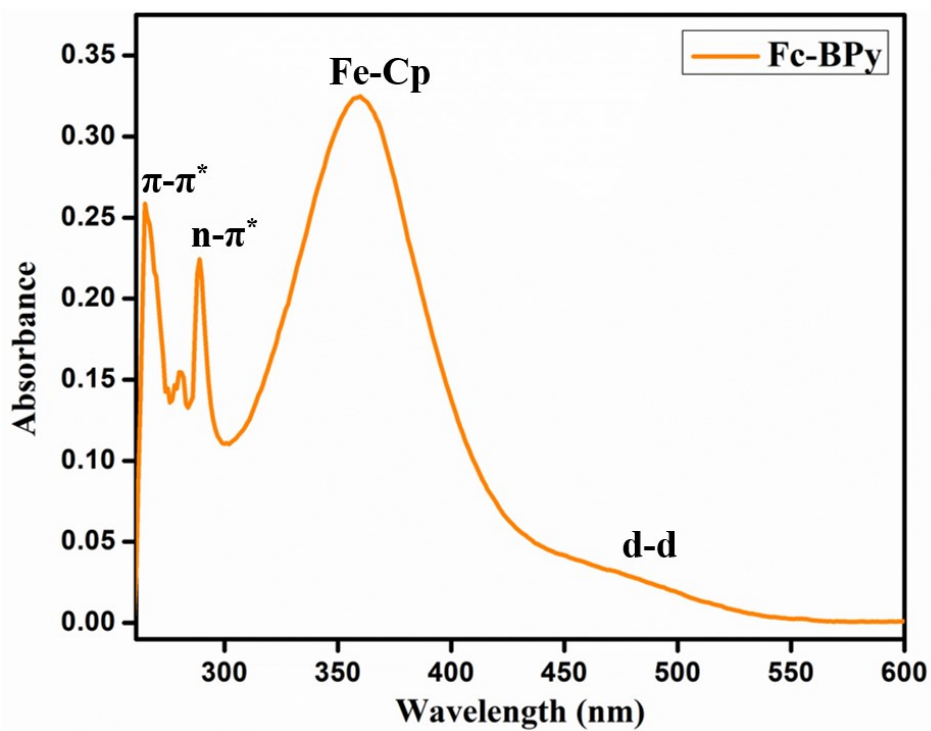

Fig. S5 UV-Vis spectroscopic response of **Fe-BPy**

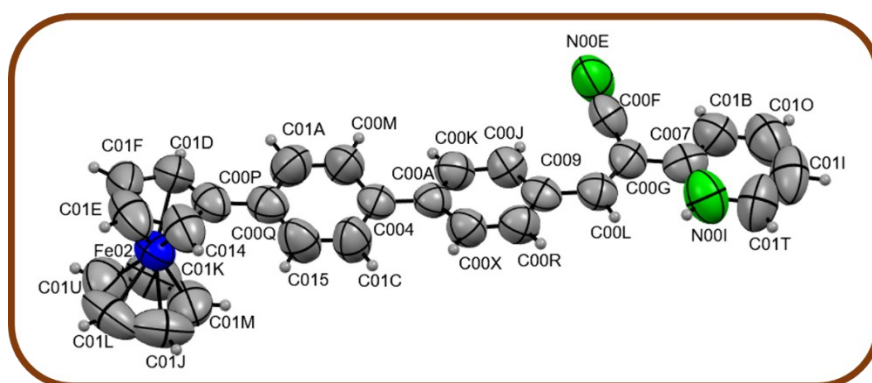

Fig. S6. Single crystal X-ray structure of **Fe-BPy** with atomic labelling (thermal ellipsoid at 50% probability level)

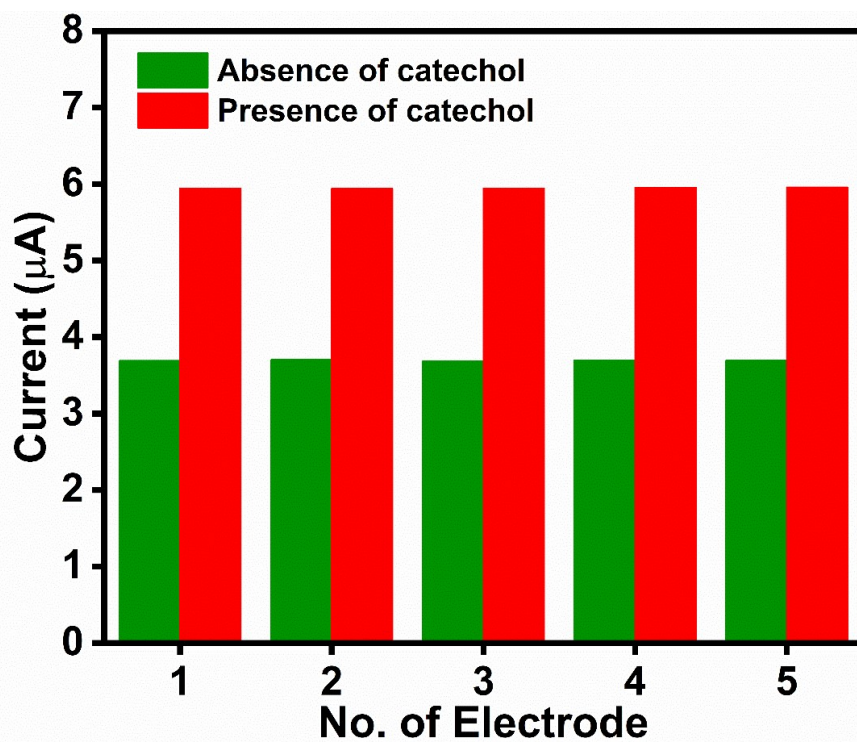

Fig. S7. Columnar diagram for the current response of five similarly prepared Fc-BPy/GCE in absence and presence of CC. Electrolyte: 0.1 M PBS

| <b>Table S1.</b> Crystal data and structural refinement of <b>Fc-BPy</b> . |                                                                                                                             |
|----------------------------------------------------------------------------|-----------------------------------------------------------------------------------------------------------------------------|
| CCDC number                                                                | 2270814                                                                                                                     |
| Empirical formula                                                          | C <sub>30</sub> H <sub>22</sub> N <sub>2</sub> Fe                                                                           |
| Formula weight                                                             | 466.10                                                                                                                      |
| Temperature                                                                | 296(2) K                                                                                                                    |
| Wavelength                                                                 | 0.71073 Å                                                                                                                   |
| Crystal system, space group                                                | Triclinic, P -1                                                                                                             |
| Unit cell dimensions                                                       | a = 10.3385(7) Å $\alpha$ = 94.760(2)°<br>b = 11.3107(8) Å $\beta$ = 98.914(2)°<br>c = 20.2487(14) Å $\gamma$ = 105.686(3)° |
| Volume                                                                     | 2232.6(3) Å <sup>3</sup>                                                                                                    |
| Z, Calculated density                                                      | 4, 1.389 Mg/m <sup>3</sup>                                                                                                  |
| Absorption coefficient                                                     | 0.697 mm <sup>-1</sup>                                                                                                      |
| F(000)                                                                     | 970                                                                                                                         |
| Crystal size                                                               | 0.23 x 0.13 x 0.03 mm                                                                                                       |
| Theta range for data collection                                            | 1.886 to 25.041 deg.                                                                                                        |
| Limiting indices                                                           | -12 ≤ h ≤ 12 -13 ≤ k ≤ 13, -24 ≤ l ≤ 24                                                                                     |
| Completeness to theta = 25.04                                              | 99.8 %                                                                                                                      |
| Absorption correction                                                      | Semi-empirical from equivalents                                                                                             |
| Ratio of min. to max. transmission                                         | 0.8951                                                                                                                      |
| Refinement method                                                          | Full-matrix least-squares on F <sup>2</sup>                                                                                 |
| Data / restraints / parameters                                             | 7894 / 0 / 596                                                                                                              |
| Goodness-of-fit on F <sup>2</sup>                                          | 1.035                                                                                                                       |
| Final R indices [I > 2σ(I)]                                                | R1 = 0.0662, wR2 = 0.1368                                                                                                   |
| R indices (all data)                                                       | R1 = 0.0987, wR2 = 0.1826                                                                                                   |
| Largest diff. peak and hole                                                | 0.302 and -0.282 e. Å <sup>-3</sup>                                                                                         |
